# Supplementary material for: Generating Cisgenic Sexing Strains in Insect Pests
Source: Research Square preprint supplement (doi:10.21203/rs.3.rs-6449302/v1), 2025-04-21
Supplement: Supplementary file 1 [file f1c53f51acf5f4d620a94dda.xlsx]

## Sheet: Fig 2 a
Pupae						Adults
IMPERIAL	Count		VIENNA 8	Count		IMPERIAL	Count		VIENNA 8	Count
F2			F2			F2			F2
Brown	678		Brown	304		Male	664		Male	289
White	677		White	218		Female	674		Female	193
F3			F3			F3			F3
Brown	687		Brown	129		Male	721		Male	124
White	734		White	94		Female	678		Female	87
F4			F4			F4			F4
Brown	307		Brown	169		Male	335		Male	155
White	336		White	115		Female	305		Female	81
F5			F5			F5			F5
Brown	222		Brown	150		Male	220		Male	132
White	227		White	91		Female	221		Female	69
F6			F6			F6			F6
Brown	150		Brown	70		Male	122		Male	61
White	129		White	46		Female	134		Female	36

## Sheet: Fig 2 b
Strain	Replicate	Eggs	Hatched larvae	Pupae	Adults
WT	1	113	91	81	78
WT	2	193	165	146	142
WT	3	71	57	49	46
VIENNA8	1	87	52	24	21
VIENNA8	2	118	72	49	43
VIENNA8	3	141	70	47	42
IMPERIAL	1	257	196	188	185
IMPERIAL	2	226	171	163	146
IMPERIAL	3	226	159	149	148

## Sheet: Fig 2 c
Strain	Sex	Replicate	D0	D1	D2	D3	D4	D5	D6	D7	D8	D9	D10	D11	D12	D13	D14	D15	D16	D17	D18	D19	D20	D21	D22	D23	D24	D25	D26	D27	D28	D29	D30
IMPERIAL	Males	1	10	10	10	10	10	10	10	10	10	10	7	7	7	7	7	7	6	6	5	4	4	2	2	2	2	0
		2	10	10	10	10	10	10	10	10	10	10	10	10	10	10	9	9	9	8	8	8	5	3	3	3	2	2	1	0
		3	10	10	10	10	10	10	10	10	10	9	7	5	4	4	4	4	4	3	2	2	0
	Females	1	10	10	10	10	10	10	10	10	10	10	10	10	10	10	10	10	10	9	9	9	6	3	3	3	3	0
		2	10	10	10	9	8	8	8	8	8	8	8	8	8	8	8	8	8	8	7	6	6	4	4	4	3	2	2	0
		3	10	10	10	10	9	9	9	9	9	9	9	9	8	8	8	8	7	7	7	7	7	7	7	7	7	7	7	5	1	0
WT	Males	1	10	10	10	10	10	10	6	6	6	5	3	3	3	3	3	3	3	3	2	1	1	0
		2	10	10	10	10	10	10	10	10	10	10	7	5	5	5	5	5	5	4	4	3	3	3	3	3	3	2	1	0
		3	10	10	10	10	10	10	10	10	10	10	10	9	9	9	8	8	7	7	5	5	3	1	1	1	1	0
	Females	1	10	10	10	10	10	10	10	10	10	10	10	10	10	9	9	9	9	9	8	8	5	3	3	3	3	2	2	1	0
		2	10	10	10	10	10	10	10	10	10	10	10	10	10	10	10	10	10	10	10	10	8	7	7	7	7	7	7	7	2	0
		3	10	10	10	10	10	10	10	10	10	10	10	10	10	10	10	10	9	9	8	8	7	7	7	6	5	4	3	2	2	1	0
VIENNA8	Males	1	10	10	10	10	10	9	7	7	7	6	6	6	6	6	6	6	5	5	5	5	5	5	5	5	5	2	1	0
		2	10	10	10	10	9	9	9	8	8	8	6	6	6	6	6	6	6	6	6	6	6	6	5	4	3	0
		3	10	10	10	10	10	10	10	10	10	10	10	10	10	8	8	8	8	8	8	8	7	6	3	0
	Females	1	10	10	10	6	6	6	6	6	6	6	6	6	6	6	6	5	3	2	0
		2	10	10	10	8	7	7	7	7	7	7	7	7	7	7	7	6	6	6	6	6	3	1	0
		3	10	10	8	8	8	8	8	8	7	6	6	6	6	4	2	2	0

## Sheet: Fig 2 d
	Replicate #	Pupae count		Day 17		Day 18		Day 19		Day 20		Day 21		Day 22		Day 23		Day 24		Day 25		Day 26		Total Adults
		White	Brown	Males	Females	Males	Females	Males	Females	Males	Females	Males	Females	Males	Females	Males	Females	Males	Females	Males	Females	Males	Females
WT	1	0	199	0	0	36	14	55	79	5	3	3	1	0	0	0	0	0	0	0	0	0	0	196
	2	0	286	0	0	63	40	66	105	2	2	1	1	0	0	0	0	0	0	0	0	0	0	280
	3	0	119	0	0	31	22	31	26	0	1	0	0	0	0	0	0	0	0	0	0	0	0	111
VIENNA8	1	16	33	0	0	0	0	5	0	14	0	6	0	1	0	3	5	0	3	0	2	0	2	41
	2	5	10	0	0	0	0	3	0	3	0	4	0	0	0	0	1	0	2	0	0	0	0	13
	3	20	29	0	0	1	0	5	0	20	0	0	0	1	0	0	6	0	2	0	8	0	1	44
IMPERIAL	1	135	101	0	0	44	33	89	68	1	0	0	0	0	0	0	0	0	0	0	0	0	0	235
	2	103	81	1	1	64	35	34	43	2	1	0	0	0	0	0	0	0	0	0	0	0	0	181
	3	206	227	6	0	98	111	100	113	2	1	0	0	0	0	0	0	0	0	0	0	0	0	431

## Sheet: Table 1
	Counts by Replicate
Paternity	1	2	3	Cumulative Counts	Cumulative Percentage (%)
Wild-type male(s)	25	16	24	65	36.93
IMPERIAL male(s)	17	15	18	50	28.41
VIENNA 8 male(s)	13	18	19	50	28.41
Wild-type + IMPERIAL male(s)	0	0	0	0	0
Wild-type + VIENNA 8 male(s)	1	0	2	3	1.7
IMPERIAL + VIENNA 8 male(s)	2	3	3	8	4.55
Total	58	52	66	176	100
